# Supplementary material for: Solution-processed high-k HfO2 gate dielectric processed under softening temperature of polymer substrates
Source: Royal Society of Chemistry journal article supplement (doi:10.1039/c2tc00481j), 2012-12-13
Supplement: c2tc00481j.pdf [file c2tc00481j.pdf]

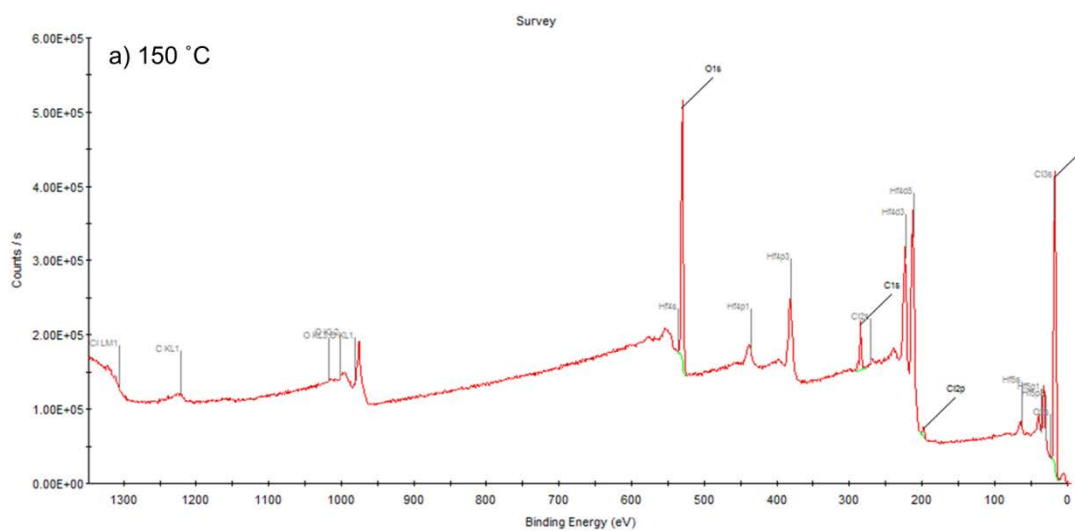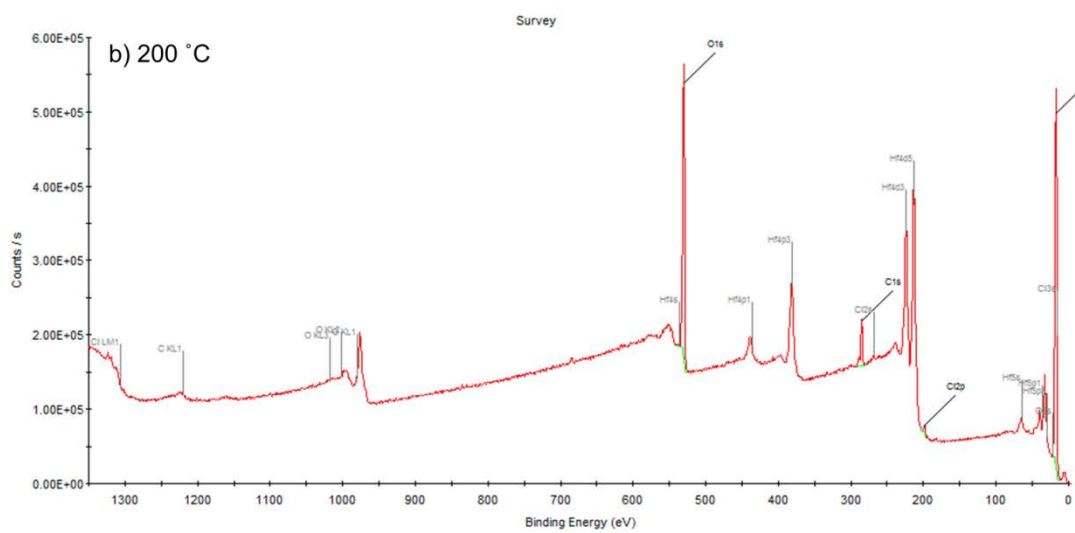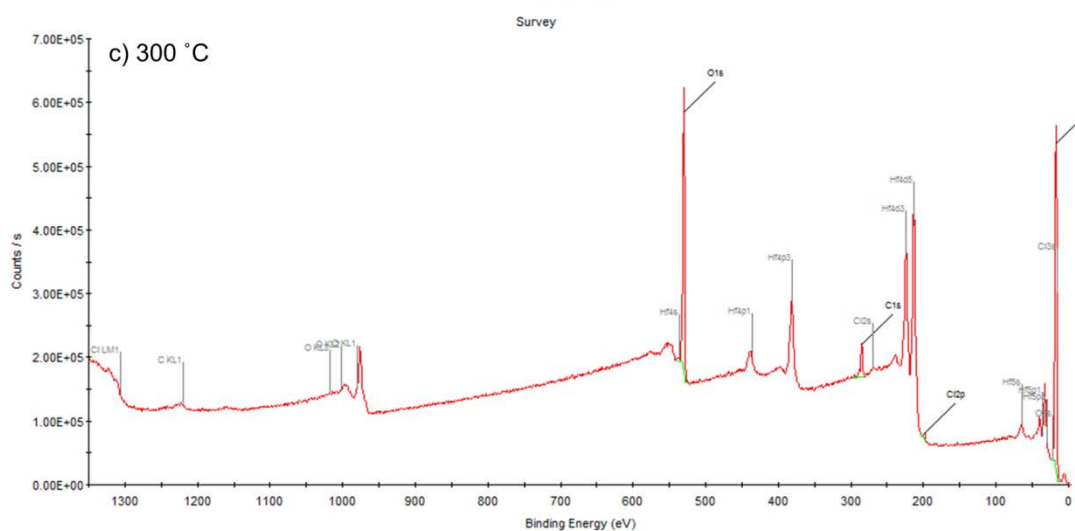



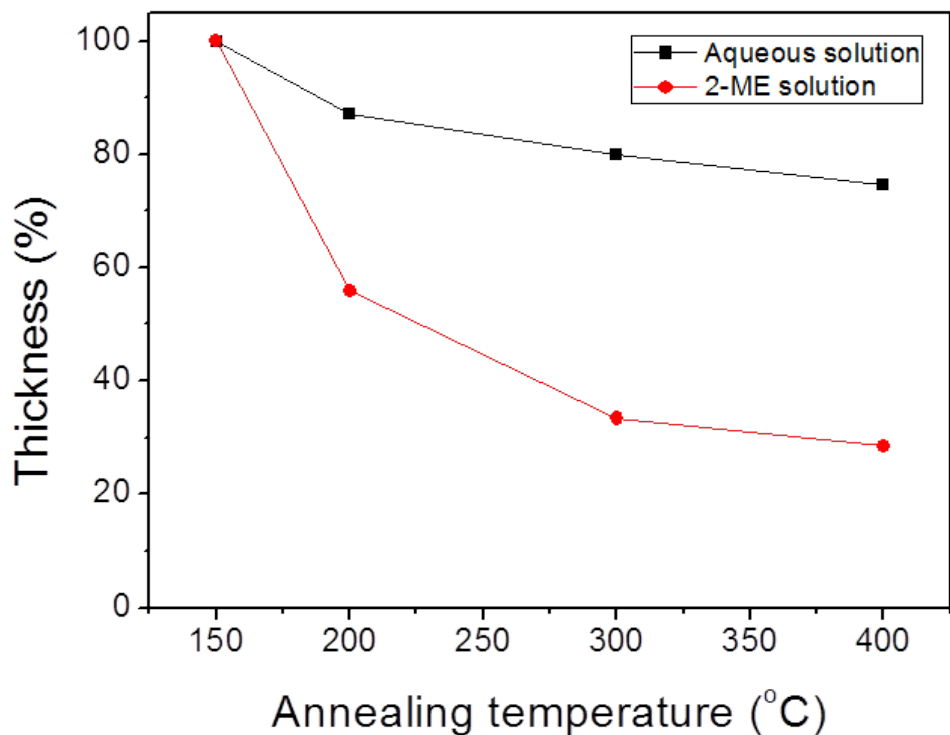

**Fig. S4** Thickness of  $\text{HfO}_2$  thin films coated from aqueous solution and from 2-methoxyethanol solution as a function of annealing temperature. Significant shrinkage of  $\text{HfO}_2$  thin film coated from 2-methoxyethanol solution indicates  $\text{HfCl}_4$  sublimation and large amount of residual precursor intermediates.

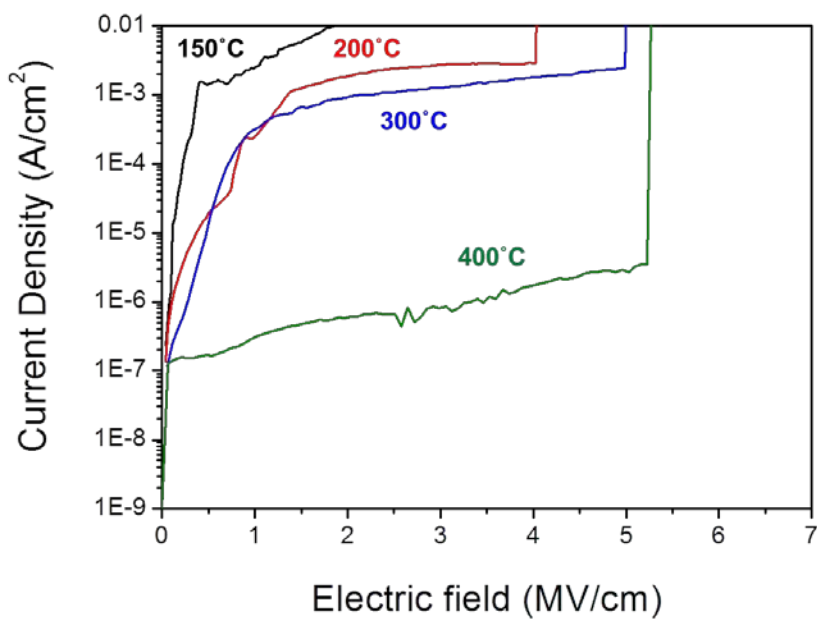

**Fig. S5** Representative current–voltage characteristics for  $\text{HfO}_2$  films that is coated from 2-methoxyethanol solution and annealed in air for 1 h with various annealing temperatures.
